CORRECTION

# Correction: Regulation of Active DNA Demethylation by a Methyl-CpG-Binding Domain Protein in *Arabidopsis thaliana*

Qi Li, Xiaokang Wang, Han Sun, Jun Zeng, Zhendong Cao, Yan Li, Weiqiang Qian

The second panel from the bottom of the left side of [Fig 1D](#), is missing. The authors have provided a corrected version here.

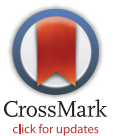

 OPEN ACCESS

**Citation:** Li Q, Wang X, Sun H, Zeng J, Cao Z, Li Y, et al. (2015) Correction: Regulation of Active DNA Demethylation by a Methyl-CpG-Binding Domain Protein in *Arabidopsis thaliana*. PLoS Genet 11(7): e1005380. doi:10.1371/journal.pgen.1005380

**Published:** July 30, 2015

**Copyright:** © 2015 Li et al. This is an open access article distributed under the terms of the [Creative Commons Attribution License](#), which permits unrestricted use, distribution, and reproduction in any medium, provided the original author and source are credited.

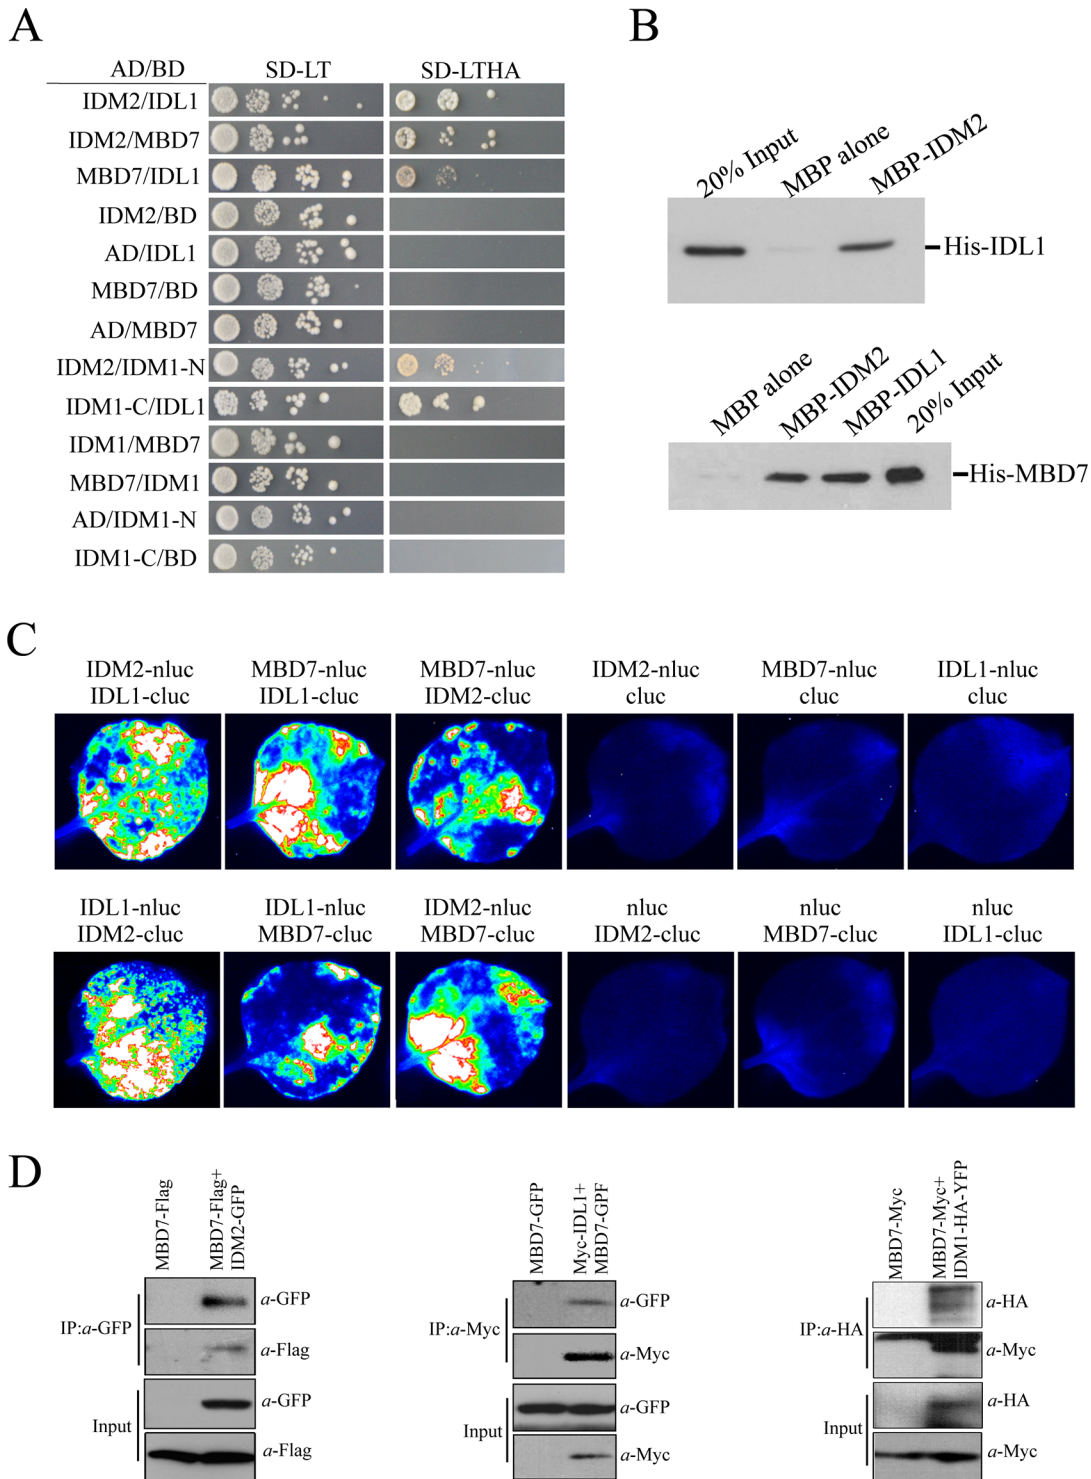

**Fig 1. Protein-protein interactions between IDM1, IDM2, IDL1 and MBD7.** (A) Yeast two-hybrid assays. Yeast cells carrying different fusion protein combinations are listed on the left. Yeast cells expressing the indicated proteins from the pGBK-T7 (BD) and pGAD-T7 (AD) vectors were plated onto medium lacking Leu and Trp (SD-LT) (left) or medium lacking Leu, Trp, Ade and His (SD-LTHA) (right). (B) Pull-down assays showing that IDM2, IDL1 and MBD7 interact with each other. (C) Split-luc assays showing that IDL1 and MBD7 can interact with IDM2 in *N. benthamiana* leaves. Three biological replicates were performed, and similar results were obtained. (D) Co-immunoprecipitation of MBD7 with IDM2 or IDL1 in tobacco leaves. MYC-tagged IDM2 and GFP-tagged IDM1 were transiently expressed in *N. benthamiana* leaves. Anti-GFP was used for immunoprecipitation (IP); anti-MYC and anti-GFP were used for immunoblotting; Input, total protein before immunoprecipitation. Transgenic plants expressing MBD7-Myc or IDM1-HA-YFP under their native promoters and their F1 offspring were used for co-IP.

doi:10.1371/journal.pgen.1005380.g001

## Reference

1. Li Q, Wang X, Sun H, Zeng J, Cao Z, Li Y, et al. (2015) Regulation of Active DNA Demethylation by a Methyl-CpG-Binding Domain Protein in *Arabidopsis thaliana*. PLoS Genet 11(5): e1005210. doi: [10.1371/journal.pgen.1005210](https://doi.org/10.1371/journal.pgen.1005210) PMID: [25933434](https://pubmed.ncbi.nlm.nih.gov/25933434/)
